# Supplementary material for: A Systematic Review of Population Monitoring Studies of Sea Turtles and Its Application to Conservation
Source: MDPI journal article supplement (doi:10.3390/d16030177), 2024-03-12
Supplement: s1 [file s1]

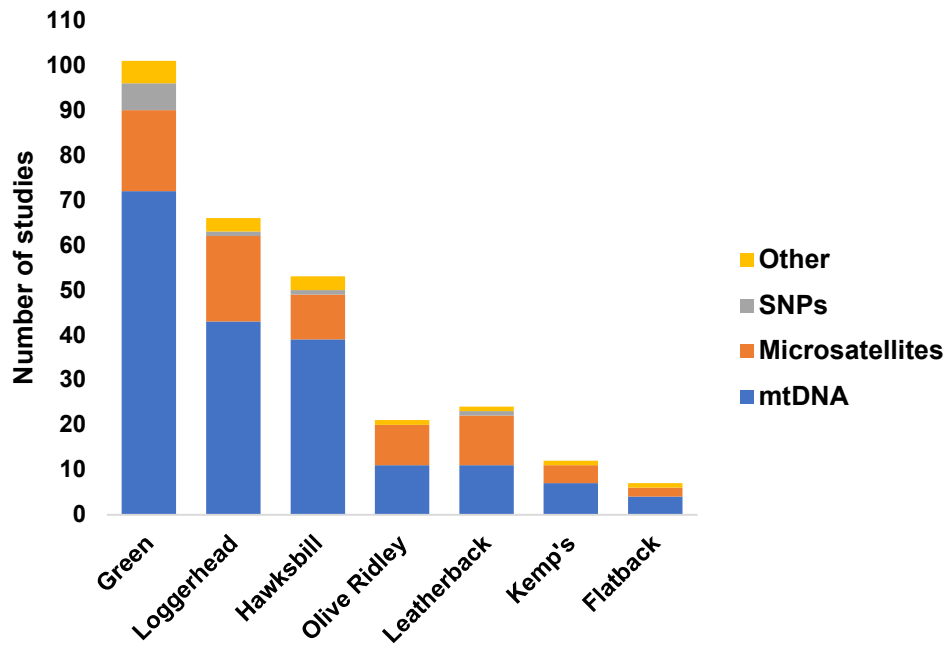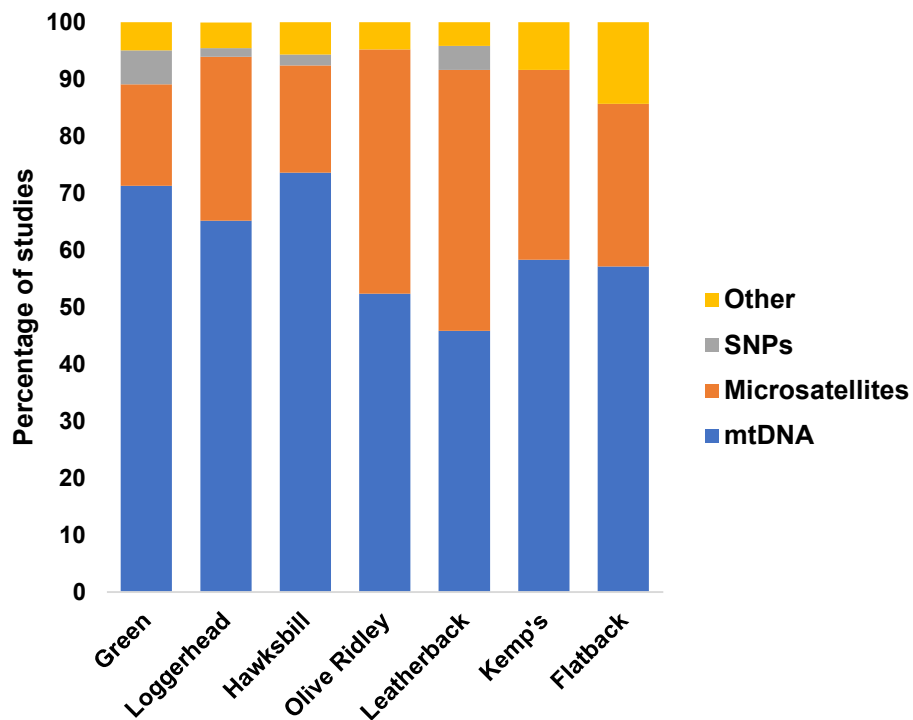

**Figure S2.** Number (top graph) and percentage (bottom graph) of genetic monitoring studies per sea turtle species using a particular genetic marker (mtDNA, microsatellites, SNPs, other markers). Percentages are calculated considering the total number of studies using genetic methods for population monitoring (total 242 studies).
