# Supplementary material for: A Systematic Review of Population Monitoring Studies of Sea Turtles and Its Application to Conservation
Source: MDPI journal article supplement (doi:10.3390/d16030177), 2024-03-12
Supplement: s1 [file s1]

**Table S3.** Number of studies on sea turtle population monitoring per year. The IUCN Red List conservation status classification of all seven sea turtle species between 1980 and 2020 is indicated on the table. No color indicates that there was no assessment available. Grey indicates Data Deficient. Green indicates Vulnerable. Yellow indicates Endangered. Blue indicates Critically Endangered. \* Denotes the year of the last IUCN species assessment. Some studies included more than one sea turtle species. Last row indicates percentage of studies on a particular species after the last IUCN species assessment.

| Year                                | Kemp's       | Flatback     | Green        | Loggerhead   | Leatherback  | Hawksbill    | Olive        |
|-------------------------------------|--------------|--------------|--------------|--------------|--------------|--------------|--------------|
| 1980                                | 0            | 0            | 1            | 0            | 0            | 0            | 0            |
| 1981                                | 0            | 0            | 1            | 0            | 0            | 1            | 1            |
| 1982                                | 0            | 0            | 0            | 0            | 0            | 0            | 0            |
| 1983                                | 0            | 0            | 0            | 0            | 0            | 0            | 0            |
| 1984                                | 0            | 0            | 0            | 0            | 0            | 0            | 0            |
| 1985                                | 0            | 0            | 0            | 0            | 0            | 0            | 0            |
| 1986                                | 0            | 0            | 0            | 0            | 0            | 0            | 0            |
| 1987                                | 0            | 0            | 0            | 0            | 0            | 1            | 0            |
| 1988                                | 0            | 0            | 0            | 1            | 0            | 0            | 0            |
| 1989                                | 0            | 0            | 0            | 0            | 0            | 0            | 0            |
| 1990                                | 0            | 0            | 1            | 0            | 0            | 0            | 0            |
| 1991                                | 1            | 0            | 0            | 0            | 0            | 0            | 1            |
| 1992                                | 0            | 0            | 3            | 0            | 0            | 0            | 0            |
| 1993                                | 1            | 1            | 1            | 1            | 1            | 0            | 1            |
| 1994                                | 0            | 0            | 2            | 2            | 0            | 0            | 0            |
| 1995                                | 3            | 1            | 4            | 4            | 0            | 2            | 0            |
| 1996                                | 1            | 2*           | 7            | 2            | 3            | 5            | 1            |
| 1997                                | 1            | 0            | 2            | 1            | 0            | 0            | 1            |
| 1998                                | 0            | 0            | 1            | 0            | 2            | 0            | 0            |
| 1999                                | 1            | 0            | 1            | 1            | 1            | 1            | 0            |
| 2000                                | 0            | 0            | 3            | 1            | 0            | 0            | 1            |
| 2001                                | 0            | 0            | 2            | 2            | 0            | 1            | 0            |
| 2002                                | 1            | 0            | 5            | 5            | 0            | 0            | 0            |
| 2003                                | 2            | 0            | 3            | 1            | 0            | 0            | 1            |
| 2004                                | 0            | 0            | 9*           | 2            | 4            | 1            | 4            |
| 2005                                | 2            | 0            | 8            | 4            | 2            | 3            | 1            |
| 2006                                | 0            | 1            | 7            | 2            | 2            | 4            | 2            |
| 2007                                | 2            | 0            | 8            | 9            | 15           | 5            | 3            |
| 2008                                | 0            | 0            | 5            | 2            | 5            | 4*           | 1*           |
| 2009                                | 0            | 1            | 5            | 6            | 2            | 4            | 2            |
| 2010                                | 1            | 1            | 8            | 7            | 4            | 5            | 3            |
| 2011                                | 1            | 0            | 4            | 11           | 7            | 8            | 4            |
| 2012                                | 3            | 1            | 20           | 25           | 7            | 10           | 5            |
| 2013                                | 0            | 1            | 21           | 18           | 9*           | 9            | 4            |
| 2014                                | 3            | 2            | 18           | 15           | 6            | 12           | 0            |
| 2015                                | 0            | 0            | 21           | 10*          | 1            | 7            | 4            |
| 2016                                | 4            | 2            | 16           | 16           | 8            | 13           | 3            |
| 2017                                | 1            | 2            | 17           | 16           | 8            | 10           | 2            |
| 2018                                | 4            | 1            | 20           | 19           | 6            | 7            | 4            |
| 2019                                | 1*           | 0            | 21           | 7            | 8            | 14           | 9            |
| 2020                                | 4            | 1            | 18           | 21           | 4            | 13           | 3            |
| <b>Total</b>                        | <b>37</b>    | <b>17</b>    | <b>263</b>   | <b>211</b>   | <b>105</b>   | <b>140</b>   | <b>61</b>    |
| <b>% of studies after last IUCN</b> | <b>13.51</b> | <b>88.24</b> | <b>85.93</b> | <b>42.18</b> | <b>47.62</b> | <b>82.86</b> | <b>72.13</b> |

---

species  
assessment

---
