# Supplementary material for: A Systematic Review of Population Monitoring Studies of Sea Turtles and Its Application to Conservation
Source: MDPI journal article supplement (doi:10.3390/d16030177), 2024-03-12
Supplement: s1 [file s1]

**Table S2.** Oceanic regions covered by population monitoring studies on each of the sea turtle species and overall percentage of studies per oceanic region (out of the 655 studies reviewed).

| Oceanic region    | Number of Studies | Olive     | Flatback  | Green      | Hawksbill  | Leatherback | Loggerhead | Kemp's    | % of studies |
|-------------------|-------------------|-----------|-----------|------------|------------|-------------|------------|-----------|--------------|
| Arabian Sea       | 20                | 1         |           | 8          | 8          | 1           | 4          |           | 6.41         |
| Arafura Sea       | 4                 |           | 1         | 3          |            | 1           |            |           | 1.37         |
| Atlantic Ocean    | 12                | 1         |           | 5          |            | 2           | 5          | 2         | 4.12         |
| Bay of Bengal     | 9                 | 9         |           |            |            |             |            |           | 2.75         |
| Bismarck Sea      | 4                 | 1         |           |            |            | 3           |            |           | 0.76         |
| Caribbean Sea     | 133               | 5         |           | 50         | 54         | 27          | 15         | 19        | 46.26        |
| Coral Sea         | 19                |           | 2         | 11         | 2          |             | 6          |           | 6.11         |
| East China Sea    | 7                 |           |           | 7          |            |             |            |           | 2.14         |
| Global            | 27                | 3         | 4         | 14         | 6          | 8           | 10         | 4         | 11.6         |
| Indian Ocean      | 36                | 3         | 6         | 18         | 12         | 5           | 8          |           | 13.44        |
| Laccadive Sea     | 3                 | 1         |           | 2          |            |             |            |           | 0.92         |
| Mediterranean Sea | 91                | 1         |           | 28         | 2          | 2           | 71         | 3         | 30.23        |
| NE Atlantic Ocean | 30                | 6         |           | 14         | 5          | 10          | 15         | 4         | 12.82        |
| NE Pacific Ocean  | 80                | 13        |           | 36         | 15         | 14          | 6          |           | 25.04        |
| NW Atlantic Ocean | 64                | 1         |           | 14         | 4          | 14          | 38         | 5         | 21.37        |
| NW Pacific Ocean  | 7                 |           |           | 6          | 1          |             | 1          |           | 2.29         |
| Pacific Ocean     | 6                 | 1         |           | 3          | 2          | 3           | 2          |           | 2.6          |
| Philippine Sea    | 1                 |           |           | 1          |            |             |            |           | 0.31         |
| Sea of Japan      | 9                 |           |           | 4          | 1          |             | 6          |           | 3.05         |
| Solomon Sea       | 2                 |           |           |            |            | 2           |            |           | 0.61         |
| South China Sea   | 18                | 2         |           | 15         | 6          | 1           | 2          |           | 6.72         |
| SE Atlantic Ocean | 10                | 3         |           | 4          | 1          | 3           | 2          |           | 3.51         |
| SE Pacific Ocean  | 6                 | 1         |           | 5          | 1          | 1           | 2          |           | 2.44         |
| SW Atlantic Ocean | 44                | 6         |           | 11         | 16         | 7           | 17         |           | 15.42        |
| SW Pacific Ocean  | 2                 |           |           | 1          | 1          |             |            |           | 0.61         |
| Tasman Sea        | 1                 |           |           | 1          |            |             |            |           | 0.31         |
| Timor Sea         | 6                 | 2         | 4         | 1          | 2          |             | 1          |           | 2.44         |
| Yellow Sea        | 4                 | 1         |           | 1          | 1          | 1           |            |           | 1.22         |
| <b>Total</b>      | <b>655</b>        | <b>61</b> | <b>17</b> | <b>263</b> | <b>140</b> | <b>105</b>  | <b>211</b> | <b>37</b> |              |
