# Supplementary material for: A Systematic Review of Population Monitoring Studies of Sea Turtles and Its Application to Conservation
Source: MDPI journal article supplement (doi:10.3390/d16030177), 2024-03-12
Supplement: s1 [file s1]

## Olive ridley (*Lepidochelys olivacea*)

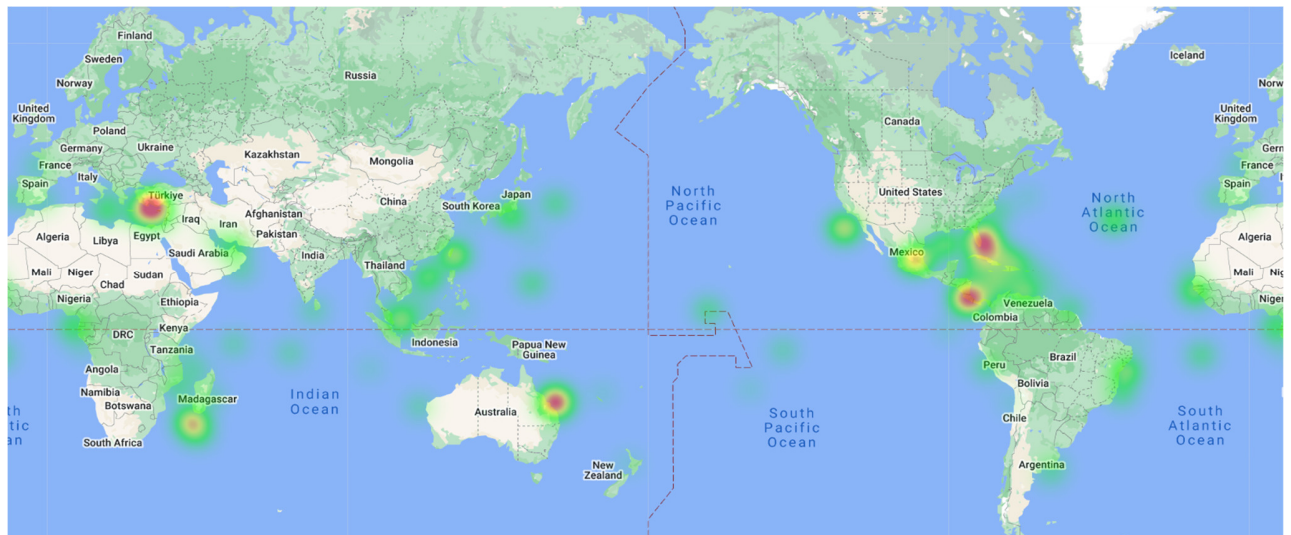

## Green (*Chelonia mydas*)

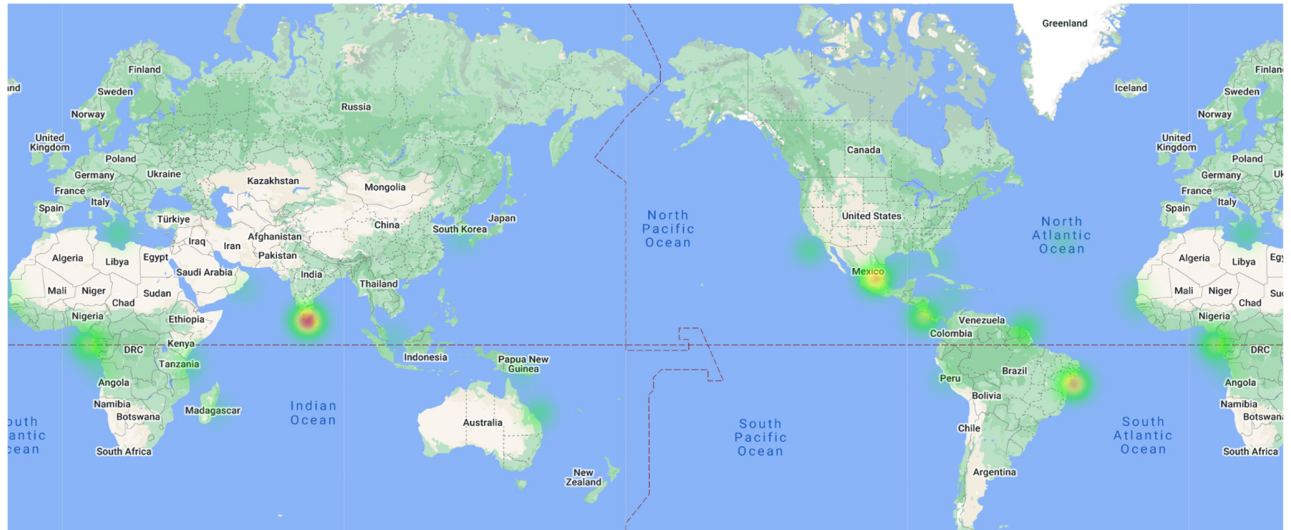

## Loggerhead (*Caretta caretta*)

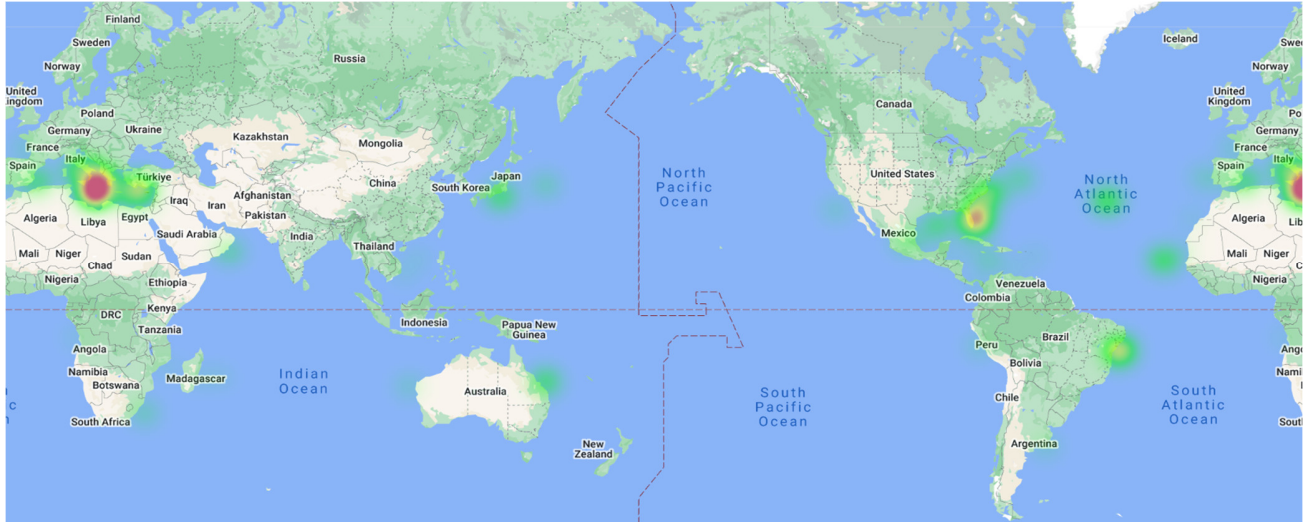

## Leatherback (*Dermochelys coriacea*)

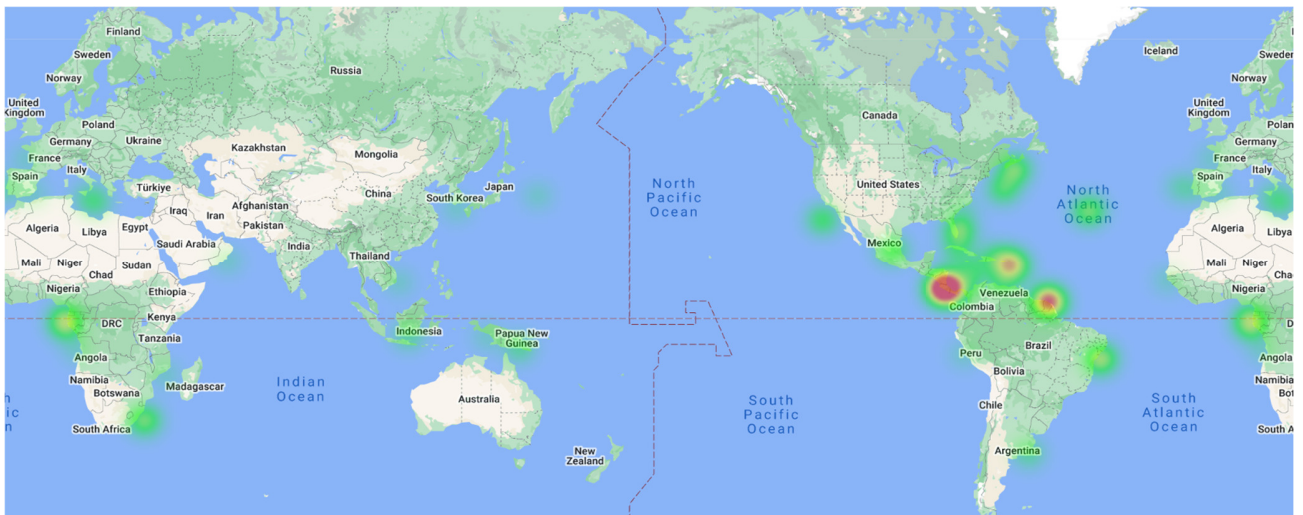

## Hawskbill (*Eretmochelys imbricata*)

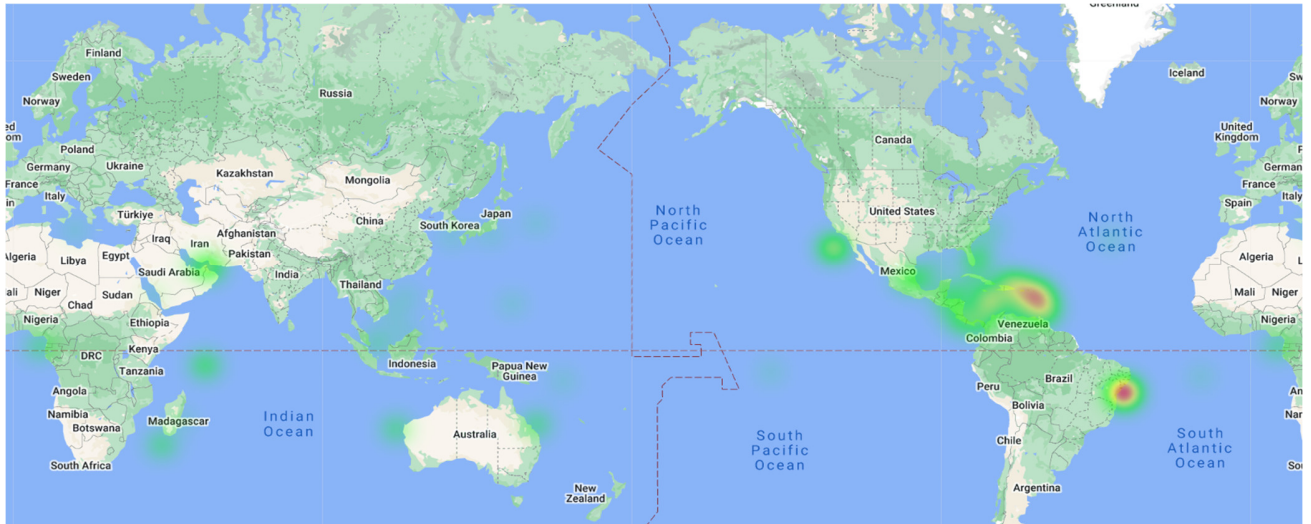

## Kemp's ridley (*Lepidochelys kempii*)

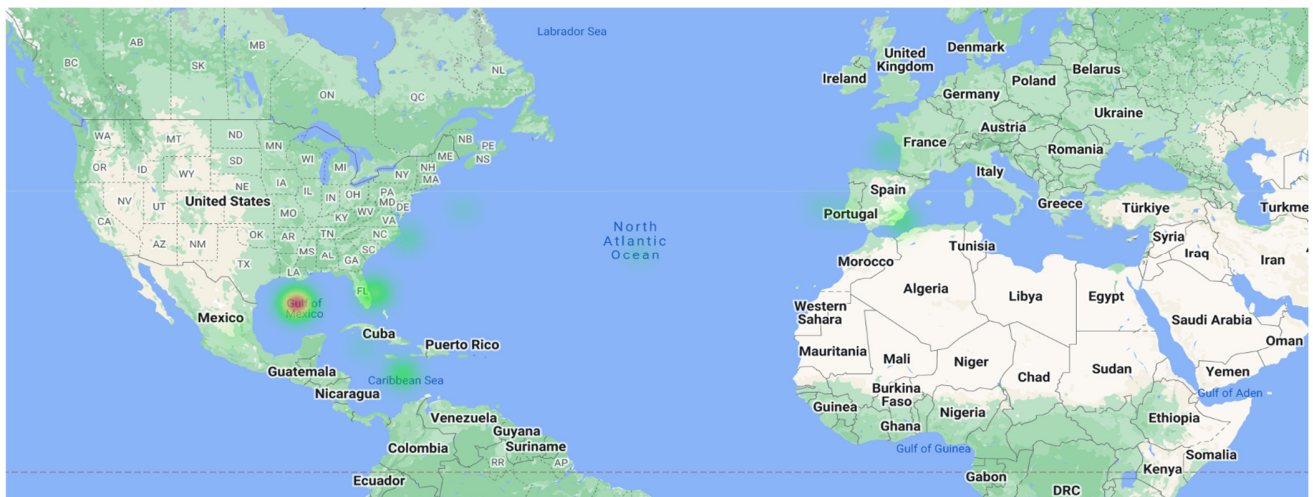



## Flatback (*Natator depressus*)

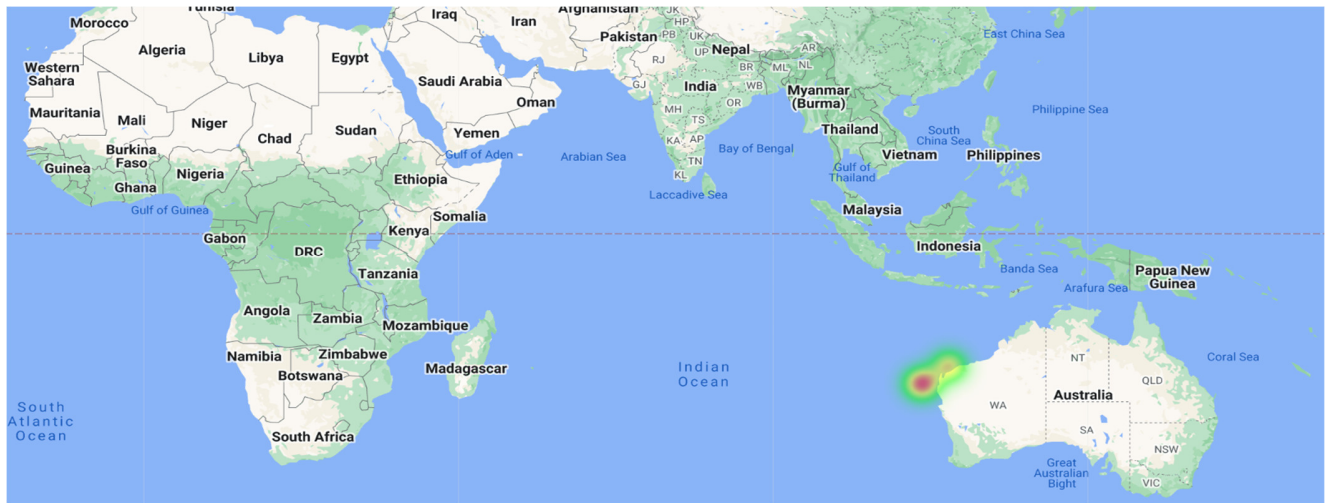

**Figure S1.** Heat maps illustrating sea turtle population monitoring (including population characterization) effort per coastal region for each sea turtle species. For habitat range distribution per species please consult IUN Red List website. Heat maps prepared using *Maptive* (20113) available at: <https://www.maptive.com/> (Downldloaded: 21 March 2021).
