# Supplementary material for: A Systematic Review of Population Monitoring Studies of Sea Turtles and Its Application to Conservation
Source: MDPI journal article supplement (doi:10.3390/d16030177), 2024-03-12
Supplement: s1 [file s1]

**Table S1.** Number of publications on sea turtle population monitoring per species across years, from 1980 to 2020. Some studies included more than one species of sea turtle. Overall percentage of studies per species out of the 655 studies reviewed.

| Date                                       | Kemp's      | Flatback    | Green        | Loggerhead   | Leatherback  | Hawksbill    | Olive       |
|--------------------------------------------|-------------|-------------|--------------|--------------|--------------|--------------|-------------|
| 1980                                       | 0           | 0           | 1            | 0            | 0            | 0            | 0           |
| 1981                                       | 0           | 0           | 1            | 0            | 0            | 1            | 1           |
| 1982                                       | 0           | 0           | 0            | 0            | 0            | 0            | 0           |
| 1983                                       | 0           | 0           | 0            | 0            | 0            | 0            | 0           |
| 1984                                       | 0           | 0           | 0            | 0            | 0            | 0            | 0           |
| 1985                                       | 0           | 0           | 0            | 0            | 0            | 0            | 0           |
| 1986                                       | 0           | 0           | 0            | 0            | 0            | 0            | 0           |
| 1987                                       | 0           | 0           | 0            | 0            | 0            | 1            | 0           |
| 1988                                       | 0           | 0           | 0            | 1            | 0            | 0            | 0           |
| 1989                                       | 0           | 0           | 0            | 0            | 0            | 0            | 0           |
| 1990                                       | 0           | 0           | 1            | 0            | 0            | 0            | 0           |
| 1991                                       | 1           | 0           | 0            | 0            | 0            | 0            | 1           |
| 1992                                       | 0           | 0           | 3            | 0            | 0            | 0            | 0           |
| 1993                                       | 1           | 1           | 1            | 1            | 1            | 0            | 1           |
| 1994                                       | 0           | 0           | 2            | 2            | 0            | 0            | 0           |
| 1995                                       | 3           | 1           | 4            | 4            | 0            | 2            | 0           |
| 1996                                       | 1           | 2           | 7            | 2            | 3            | 5            | 1           |
| 1997                                       | 1           | 0           | 2            | 1            | 0            | 0            | 1           |
| 1998                                       | 0           | 0           | 1            | 0            | 2            | 0            | 0           |
| 1999                                       | 1           | 0           | 1            | 1            | 1            | 1            | 0           |
| 2000                                       | 0           | 0           | 3            | 1            | 0            | 0            | 1           |
| 2001                                       | 0           | 0           | 2            | 2            | 0            | 1            | 0           |
| 2002                                       | 1           | 0           | 5            | 5            | 0            | 0            | 0           |
| 2003                                       | 2           | 0           | 3            | 1            | 0            | 0            | 1           |
| 2004                                       | 0           | 0           | 9            | 2            | 4            | 1            | 4           |
| 2005                                       | 2           | 0           | 8            | 4            | 2            | 3            | 1           |
| 2006                                       | 0           | 1           | 7            | 2            | 2            | 4            | 2           |
| 2007                                       | 2           | 0           | 8            | 9            | 15           | 5            | 3           |
| 2008                                       | 0           | 0           | 5            | 2            | 5            | 4            | 1           |
| 2009                                       | 0           | 1           | 5            | 6            | 2            | 4            | 2           |
| 2010                                       | 1           | 1           | 8            | 7            | 4            | 5            | 3           |
| 2011                                       | 1           | 0           | 4            | 11           | 7            | 8            | 4           |
| 2012                                       | 3           | 1           | 20           | 25           | 7            | 10           | 5           |
| 2013                                       | 0           | 1           | 21           | 18           | 9            | 9            | 4           |
| 2014                                       | 3           | 2           | 18           | 15           | 6            | 12           | 0           |
| 2015                                       | 0           | 0           | 21           | 10           | 1            | 7            | 4           |
| 2016                                       | 4           | 2           | 16           | 16           | 8            | 13           | 3           |
| 2017                                       | 1           | 2           | 17           | 16           | 8            | 10           | 2           |
| 2018                                       | 4           | 1           | 20           | 19           | 6            | 7            | 4           |
| 2019                                       | 1           | 0           | 21           | 7            | 8            | 14           | 9           |
| 2020                                       | 4           | 1           | 18           | 21           | 4            | 13           | 3           |
| <b>Total</b>                               | <b>37</b>   | <b>17</b>   | <b>263</b>   | <b>211</b>   | <b>105</b>   | <b>140</b>   | <b>61</b>   |
| <b>Percentage<br/>(out of 655 studies)</b> | <b>5.65</b> | <b>2.60</b> | <b>40.15</b> | <b>32.31</b> | <b>16.03</b> | <b>21.37</b> | <b>9.31</b> |
