# Supplementary material for: A Systematic Review of Population Monitoring Studies of Sea Turtles and Its Application to Conservation
Source: MDPI journal article supplement (doi:10.3390/d16030177), 2024-03-12
Supplement: s1 [file s1]

**Table S5.** Number and percentage of studies reporting results from field-based methods for sea turtle population monitoring. Percentages are based on the total number of publications using field-based methods (n = 424).

| Method                         | Number of publications | % studies |
|--------------------------------|------------------------|-----------|
| Satellite                      | 134                    | 31.60     |
| Nest Surveys                   | 125                    | 29.48     |
| Tagging/Capture-Mark-Recapture | 81                     | 19.10     |
| Existing/Historic Data         | 52                     | 12.26     |
| Fishery Data                   | 52                     | 12.26     |
| Beach/Track Surveys            | 39                     | 9.20      |
| Morphological Analysis         | 39                     | 9.20      |
| Isotope Analysis               | 19                     | 4.48      |
| Citizen Participation          | 16                     | 3.77      |
| Simulation                     | 15                     | 3.54      |
| Aerial                         | 14                     | 3.30      |
| In-water Surveys               | 10                     | 2.36      |
| Photo/Video                    | 10                     | 2.36      |
| Histological Analysis          | 6                      | 1.42      |
| Acoustic Telemetry             | 5                      | 1.18      |
| GIS                            | 4                      | 0.94      |
| Radio/Sonic Telemetry          | 4                      | 0.94      |
| Laparoscopy                    | 2                      | 0.47      |
| Oceanic Data                   | 2                      | 0.47      |
| Temperature Loggers            | 2                      | 0.47      |
| Transects                      | 2                      | 0.47      |
| Carcass Counts                 | 1                      | 0.24      |
| Lagrangian drifter data        | 1                      | 0.24      |
| Testosterone Radioimmunoassay  | 1                      | 0.24      |
