# Supplementary material for: A Systematic Review of Population Monitoring Studies of Sea Turtles and Its Application to Conservation
Source: MDPI journal article supplement (doi:10.3390/d16030177), 2024-03-12
Supplement: s1 [file s1]

**Table S4.** Number and percentage of publications for each population parameter assessed in sea turtle population monitoring. Some studies assessed more than one population parameter. Percentage of studies calculated out of 655 studies reviewed.

| Population parameter         | Number of publications | % studies |
|------------------------------|------------------------|-----------|
| abundance (current/historic) | 206                    | 31.45     |
| gene flow                    | 8                      | 1.22      |
| genetic diversity            | 67                     | 10.23     |
| habitat range                | 172                    | 26.26     |
| hybridization                | 13                     | 1.98      |
| migration                    | 63                     | 9.62      |
| multiple paternity           | 22                     | 3.36      |
| origin                       | 103                    | 15.73     |
| other                        | 9                      | 1.37      |
| phylogeny                    | 25                     | 3.82      |
| population structure         | 138                    | 21.07     |
| sex ratio                    | 40                     | 6.11      |
| survivability                | 93                     | 14.20     |
